# Supplementary material for: Eustress with H2O2 Facilitates Plant Growth by Improving Tolerance to Salt Stress in Two Wheat Cultivars
Source: PubMed Central journal article supplement (PMC6783893; doi:10.3390/plants8090303), 2019-08-27
Supplement: plants-08-00303-s001.pdf [file plants-08-00303-s001.pdf]

**Table S1.** Inter-simple sequence repeat (ISSR) analysis of polymorphic bands for eight treatments using six primers. T1 = W + W (0%); T2 = H<sub>2</sub>O<sub>2</sub> + W (0%); T3 = W + SW (35%); T4 = H<sub>2</sub>O<sub>2</sub> + SW (35%).

| Primer name   | P%     | Base pair (bp) | Gemmiza 11     |                |                |                | Misr 1         |                |                |                |
|---------------|--------|----------------|----------------|----------------|----------------|----------------|----------------|----------------|----------------|----------------|
|               |        |                | T <sub>1</sub> | T <sub>2</sub> | T <sub>3</sub> | T <sub>4</sub> | T <sub>1</sub> | T <sub>2</sub> | T <sub>3</sub> | T <sub>4</sub> |
| ISSR-1        | 72.22% | 1150           | (+)            | (+)            | (-)            | (+)            | (+)            | (+)            | (-)            | (+)            |
|               |        | 820            | (+)            | (-)            | (-)            | (-)            | (-)            | (-)            | (+)*           | (-)            |
|               |        | 740            | (-)            | (-)            | (-)            | (-)            | (-)            | (-)            | (-)            | (+)*           |
|               |        | 480            | (+)            | (-)            | (-)            | (-)            | (-)            | (+)*           | (+)*           | (+)*           |
|               |        | 430            | (-)            | (-)            | (-)            | (+)*           | (-)            | (-)            | (-)            | (+)*           |
|               |        | 420            | (-)            | (-)            | (-)            | (+)            | (-)            | (+)*           | (-)            | (+)*           |
|               |        | 390            | (-)            | (-)            | (-)            | (+)            | (+)            | (+)            | (-)            | (+)            |
|               |        | 320            | (-)            | (+)*           | (-)            | (+)*           | (-)            | (+)*           | (-)            | (+)*           |
|               |        | 280            | (-)            | (-)            | (+)*           | (-)            | (-)            | (-)            | (+)*           | (-)            |
|               |        | 230            | (-)            | (+)*           | (-)            | (+)*           | (-)            | (+)*           | (-)            | (+)*           |
|               |        | 180            | (+)            | (-)            | (+)            | (+)            | (-)            | (+)*           | (+)*           | (+)*           |
|               |        | 160            | (-)            | (-)            | (-)            | (-)            | (-)            | (+)*           | (-)            | (+)*           |
|               |        | 140            | (-)            | (-)            | (-)            | (-)            | (-)            | (-)            | (+)*           | (-)            |
| New bands (*) |        |                | 0              | 2              | 1              | 3              | 0              | 6              | 5              | 8              |
| Total bands   |        |                | 4              | 3              | 2              | 7              | 2              | 8              | 5              | 10             |
| Primer name   | P%     | Base pair (bp) | Gemmiza 11     |                |                |                | Misr 1         |                |                |                |
|               |        |                | T <sub>1</sub> | T <sub>2</sub> | T <sub>3</sub> | T <sub>4</sub> | T <sub>1</sub> | T <sub>2</sub> | T <sub>3</sub> | T <sub>4</sub> |
| ISSR-2        | 54.54% | 1200           | (-)            | (-)            | (-)            | (+)*           | (-)            | (-)            | (-)            | (+)*           |
|               |        | 480            | (-)            | (-)            | (-)            | (-)            | (-)            | (-)            | (+)*           | (-)            |
|               |        | 350            | (-)            | (-)            | (+)*           | (-)            | (-)            | (-)            | (+)*           | (-)            |
|               |        | 330            | (+)            | (+)            | (-)            | (+)            | (+)            | (+)            | (-)            | (+)            |
|               |        | 300            | (-)            | (-)            | (-)            | (-)            | (-)            | (+)*           | (+)*           | (+)*           |
|               |        | 230            | (-)            | (+)*           | (-)            | (-)            | (-)            | (+)*           | (-)            | (+)*           |
| New bands (*) |        |                | 0              | 1              | 1              | 1              | 0              | 2              | 3              | 3              |
| Total bands   |        |                | 1              | 2              | 1              | 2              | 1              | 3              | 3              | 4              |
| Primer name   | P%     | Base pair (bp) | Gemmiza 11     |                |                |                | Misr 1         |                |                |                |
|               |        |                | T <sub>1</sub> | T <sub>2</sub> | T <sub>3</sub> | T <sub>4</sub> | T <sub>1</sub> | T <sub>2</sub> | T <sub>3</sub> | T <sub>4</sub> |
| ISSR-3        | 92%    | 2000           | (+)            | (+)            | (-)            | (-)            | (+)            | (+)            | (-)            | (+)            |
|               |        | 1700           | (-)            | (+)*           | (+)*           | (+)*           | (-)            | (+)*           | (+)*           | (+)*           |
|               |        | 1550           | (-)            | (+)            | (-)            | (+)            | (-)            | (-)            | (-)            | (+)            |
|               |        | 1450           | (+)            | (+)            | (-)            | (+)            | (+)            | (+)            | (-)            | (+)            |
|               |        | 1300           | (-)            | (+)*           | (+)*           | (+)*           | (-)            | (+)*           | (+)*           | (+)*           |
|               |        | 1200           | (-)            | (+)            | (+)            | (+)            | (-)            | (+)*           | (-)            | (+)*           |
|               |        | 1150           | (-)            | (-)            | (-)            | (-)            | (-)            | (+)*           | (-)            | (+)*           |
|               |        | 1050           | (+)            | (+)            | (-)            | (+)            | (-)            | (-)            | (-)            | (+)*           |
|               |        | 970            | (-)            | (+)            | (+)*           | (+)*           | (+)            | (+)            | (-)            | (+)            |
|               |        | 870            | (+)            | (+)            | (-)            | (+)            | (-)            | (+)            | (+)            | (+)            |
|               |        | 840            | (-)            | (-)            | (-)            | (+)            | (-)            | (+)*           | (-)            | (+)*           |
|               |        | 820            | (-)            | (+)            | (+)            | (-)            | (-)            | (-)            | (+)*           | (-)            |
|               |        | 750            | (+)            | (-)            | (-)            | (-)            | (-)            | (-)            | (-)            | (+)*           |
|               |        | 720            | (+)            | (-)            | (-)            | (+)            | (+)            | (-)            | (+)            | (-)            |
|               |        | 570            | (-)            | (+)            | (+)            | (-)            | (-)            | (+)*           | (-)            | (+)*           |
|               |        | 520            | (-)            | (+)            | (+)            | (+)            | (+)            | (+)            | (-)            | (+)            |
|               |        | 480            | (-)            | (+)            | (+)            | (+)            | (+)            | (-)            | (+)            | (+)            |
|               |        | 440            | (+)            | (-)            | (+)            | (+)            | (+)            | (-)            | (-)            | (-)            |
|               |        | 380            | (+)            | (+)            | (-)            | (+)            | (+)            | (+)            | (-)            | (+)            |
|               |        | 320            | (-)            | (+)*           | (-)            | (+)*           | (-)            | (+)*           | (-)            | (+)*           |
| 270           | (+)    | (+)            | (+)            | (+)            | (-)            | (-)            | (+)*           | (-)            |                |                |
| 230           | (+)    | (+)            | (-)            | (+)            | (+)            | (+)            | (-)            | (+)            |                |                |
| 210           | (+)    | (-)            | (-)            | (+)            | (-)            | (-)            | (-)            | (+)*           |                |                |

|                      |               |                       |                      |                      |                      |                      |                      |                      |                      |                      |      |
|----------------------|---------------|-----------------------|----------------------|----------------------|----------------------|----------------------|----------------------|----------------------|----------------------|----------------------|------|
| <b>New bands (*)</b> |               |                       | <b>0</b>             | <b>3</b>             | <b>3</b>             | <b>4</b>             | <b>0</b>             | <b>7</b>             | <b>4</b>             | <b>10</b>            |      |
| <b>Total bands</b>   |               |                       | <b>11</b>            | <b>17</b>            | <b>10</b>            | <b>18</b>            | <b>9</b>             | <b>14</b>            | <b>7</b>             | <b>19</b>            |      |
|                      |               |                       | <b>Gemmiza 11</b>    |                      |                      |                      | <b>Misr 1</b>        |                      |                      |                      |      |
| <b>Primer name</b>   | <b>P%</b>     | <b>Base pair (bp)</b> | <b>T<sub>1</sub></b> | <b>T<sub>2</sub></b> | <b>T<sub>3</sub></b> | <b>T<sub>4</sub></b> | <b>T<sub>1</sub></b> | <b>T<sub>2</sub></b> | <b>T<sub>3</sub></b> | <b>T<sub>4</sub></b> |      |
| <b>ISSR-4</b>        | <b>82.35%</b> | <b>1450</b>           | (-)                  | (+)                  | (+)                  | (+)                  | (-)                  | (-)                  | (+)*                 | (-)                  |      |
|                      |               | <b>1100</b>           | (-)                  | (+)*                 | (-)                  | (+)*                 | (-)                  | (+)*                 | (-)                  | (+)*                 |      |
|                      |               | <b>1000</b>           | (-)                  | (+)*                 | (-)                  | (+)*                 | (-)                  | (+)*                 | (+)*                 | (+)*                 |      |
|                      |               | <b>900</b>            | (+)                  | (+)                  | (-)                  | (+)                  | (+)                  | (+)                  | (-)                  | (+)                  |      |
|                      |               | <b>800</b>            | (-)                  | (+)                  | (+)                  | (+)                  | (+)                  | (+)                  | (+)                  | (+)                  |      |
|                      |               | <b>740</b>            | (-)                  | (-)                  | (+)*                 | (-)                  | (-)                  | (+)*                 | (-)                  | (+)*                 |      |
|                      |               | <b>680</b>            | (-)                  | (-)                  | (+)                  | (+)                  | (-)                  | (-)                  | (-)                  | (-)                  |      |
|                      |               | <b>620</b>            | (-)                  | (-)                  | (+)                  | (+)                  | (+)                  | (+)                  | (+)                  | (-)                  | (+)  |
|                      |               | <b>550</b>            | (-)                  | (-)                  | (+)*                 | (-)                  | (-)                  | (+)*                 | (+)*                 | (+)*                 | (+)* |
|                      |               | <b>510</b>            | (+)                  | (-)                  | (-)                  | (-)                  | (-)                  | (+)*                 | (-)                  | (+)*                 |      |
|                      |               | <b>430</b>            | (+)                  | (-)                  | (-)                  | (+)                  | (-)                  | (-)                  | (-)                  | (-)                  | (+)* |
|                      |               | <b>400</b>            | (-)                  | (+)                  | (+)                  | (+)                  | (-)                  | (-)                  | (-)                  | (-)                  | (+)* |
|                      |               | <b>360</b>            | (-)                  | (-)                  | (-)                  | (+)                  | (+)                  | (+)                  | (+)                  | (-)                  | (+)  |
| <b>260</b>           | (-)           | (+)                   | (-)                  | (+)                  | (-)                  | (+)*                 | (+)*                 | (+)*                 | (+)*                 |                      |      |
| <b>New bands (*)</b> |               |                       | <b>0</b>             | <b>2</b>             | <b>2</b>             | <b>2</b>             | <b>0</b>             | <b>6</b>             | <b>4</b>             | <b>8</b>             |      |
| <b>Total bands</b>   |               |                       | <b>3</b>             | <b>7</b>             | <b>7</b>             | <b>11</b>            | <b>4</b>             | <b>10</b>            | <b>5</b>             | <b>12</b>            |      |
|                      |               |                       | <b>Gemmiza 11</b>    |                      |                      |                      | <b>Misr 1</b>        |                      |                      |                      |      |
| <b>Primer name</b>   | <b>P%</b>     | <b>Base pair (bp)</b> | <b>T<sub>1</sub></b> | <b>T<sub>2</sub></b> | <b>T<sub>3</sub></b> | <b>T<sub>4</sub></b> | <b>T<sub>1</sub></b> | <b>T<sub>2</sub></b> | <b>T<sub>3</sub></b> | <b>T<sub>4</sub></b> |      |
| <b>ISSR-5</b>        | <b>84.21%</b> | <b>1350</b>           | (+)                  | (-)                  | (-)                  | (-)                  | (-)                  | (-)                  | (+)*                 | (-)                  |      |
|                      |               | <b>1100</b>           | (-)                  | (+)*                 | (-)                  | (+)*                 | (-)                  | (+)*                 | (-)                  | (+)*                 |      |
|                      |               | <b>1000</b>           | (+)                  | (+)                  | (-)                  | (-)                  | (+)                  | (+)                  | (-)                  | (+)                  |      |
|                      |               | <b>910</b>            | (-)                  | (-)                  | (-)                  | (-)                  | (-)                  | (+)*                 | (-)                  | (+)*                 |      |
|                      |               | <b>850</b>            | (+)                  | (-)                  | (+)                  | (-)                  | (+)                  | (-)                  | (-)                  | (-)                  |      |
|                      |               | <b>800</b>            | (-)                  | (+)                  | (-)                  | (-)                  | (+)                  | (+)                  | (-)                  | (+)                  |      |
|                      |               | <b>710</b>            | (+)                  | (-)                  | (+)                  | (-)                  | (-)                  | (-)                  | (+)*                 | (-)                  |      |
|                      |               | <b>660</b>            | (+)                  | (+)                  | (+)                  | (+)                  | (+)                  | (+)                  | (+)                  | (-)                  | (+)  |
|                      |               | <b>620</b>            | (-)                  | (-)                  | (+)*                 | (-)                  | (-)                  | (-)                  | (-)                  | (+)*                 | (-)  |
|                      |               | <b>540</b>            | (-)                  | (-)                  | (+)*                 | (-)                  | (-)                  | (-)                  | (-)                  | (+)*                 | (-)  |
|                      |               | <b>390</b>            | (-)                  | (+)*                 | (-)                  | (+)*                 | (-)                  | (+)*                 | (-)                  | (-)                  | (+)* |
|                      |               | <b>360</b>            | (-)                  | (-)                  | (-)                  | (-)                  | (-)                  | (+)*                 | (-)                  | (-)                  | (+)* |
|                      |               | <b>340</b>            | (-)                  | (-)                  | (-)                  | (+)                  | (-)                  | (-)                  | (-)                  | (-)                  | (+)* |
|                      |               | <b>320</b>            | (-)                  | (+)                  | (-)                  | (+)                  | (-)                  | (+)*                 | (-)                  | (-)                  | (+)* |
| <b>250</b>           | (-)           | (-)                   | (-)                  | (-)                  | (+)                  | (-)                  | (-)                  | (-)                  | (+)                  |                      |      |
| <b>230</b>           | (-)           | (+)                   | (-)                  | (+)                  | (-)                  | (+)*                 | (-)                  | (-)                  | (+)*                 |                      |      |
| <b>New bands (*)</b> |               |                       | <b>0</b>             | <b>2</b>             | <b>2</b>             | <b>2</b>             | <b>0</b>             | <b>6</b>             | <b>4</b>             | <b>7</b>             |      |
| <b>Total bands</b>   |               |                       | <b>5</b>             | <b>7</b>             | <b>5</b>             | <b>6</b>             | <b>5</b>             | <b>9</b>             | <b>4</b>             | <b>11</b>            |      |
|                      |               |                       | <b>Gemmiza 11</b>    |                      |                      |                      | <b>Misr 1</b>        |                      |                      |                      |      |
| <b>Primer name</b>   | <b>P%</b>     | <b>Base pair (bp)</b> | <b>T<sub>1</sub></b> | <b>T<sub>2</sub></b> | <b>T<sub>3</sub></b> | <b>T<sub>4</sub></b> | <b>T<sub>1</sub></b> | <b>T<sub>2</sub></b> | <b>T<sub>3</sub></b> | <b>T<sub>4</sub></b> |      |
| <b>ISSR-6</b>        | <b>81.81%</b> | <b>970</b>            | (+)                  | (-)                  | (+)                  | (+)                  | (+)                  | (+)                  | (-)                  | (+)                  |      |
|                      |               | <b>760</b>            | (-)                  | (+)                  | (-)                  | (-)                  | (-)                  | (-)                  | (+)*                 | (-)                  |      |
|                      |               | <b>590</b>            | (+)                  | (+)                  | (-)                  | (+)                  | (-)                  | (-)                  | (-)                  | (+)*                 |      |
|                      |               | <b>440</b>            | (+)                  | (+)                  | (-)                  | (-)                  | (+)                  | (+)                  | (+)                  | (+)                  |      |
|                      |               | <b>380</b>            | (+)                  | (+)                  | (+)                  | (+)                  | (-)                  | (-)                  | (+)*                 | (-)                  |      |
|                      |               | <b>320</b>            | (-)                  | (+)*                 | (-)                  | (+)*                 | (-)                  | (+)*                 | (-)                  | (+)*                 |      |
|                      |               | <b>260</b>            | (+)                  | (-)                  | (+)                  | (+)                  | (+)                  | (+)                  | (+)                  | (-)                  | (+)  |
|                      |               | <b>230</b>            | (-)                  | (+)                  | (-)                  | (-)                  | (-)                  | (-)                  | (-)                  | (-)                  | (+)* |
| <b>160</b>           | (-)           | (+)*                  | (-)                  | (+)*                 | (-)                  | (+)*                 | (+)*                 | (-)                  | (+)*                 |                      |      |
| <b>New bands(*)</b>  |               |                       | <b>0</b>             | <b>2</b>             | <b>0</b>             | <b>2</b>             | <b>0</b>             | <b>2</b>             | <b>2</b>             | <b>4</b>             |      |
| <b>Total bands</b>   |               |                       | <b>5</b>             | <b>7</b>             | <b>3</b>             | <b>6</b>             | <b>3</b>             | <b>5</b>             | <b>3</b>             | <b>7</b>             |      |
